# Supplementary material for: Canadian Children from Food Insecure Households Experience Low Self-Esteem and Self-Efficacy for Healthy Lifestyle Choices
Source: PubMed Central journal article supplement (PMC6472195; doi:10.3390/nu11030675), 2019-03-21
Supplement: nutrients-11-00675-s001.pdf [file nutrients-11-00675-s001.pdf]

**Table S1.** Relationship between food insecurity and self-efficacy for physical activity and healthy eating among grade 5 students (aged 10-11 years) in Nova Scotia, Canada

| <b>PA Self-efficacy</b>  |                             |              |                             |              |                      |         |
|--------------------------|-----------------------------|--------------|-----------------------------|--------------|----------------------|---------|
|                          | All students                |              | Girls                       |              | Boys                 |         |
|                          | B (95%CI)                   | p-Value      | B (95%CI)                   | p-Value      | B (95%CI)            | p-Value |
| <b>Univariate</b>        |                             |              |                             |              |                      |         |
| Food secure              | 0.00                        | -            | 0.00                        | -            | 0.00                 | -       |
| Marginal FI <sup>1</sup> | -0.18 (-1.91, 1.55)         | 0.838        | -0.31 (-2.71, 2.09)         | 0.797        | 0.18 (-2.11, 2.47)   | 0.876   |
| Moderate FI <sup>1</sup> | <b>-2.29 (-3.81, -0.77)</b> | <b>0.003</b> | <b>-2.80 (-4.66, -0.94)</b> | <b>0.003</b> | -1.69 (-3.94, 0.56)  | 0.141   |
| Severe FI <sup>1</sup>   | <b>-2.52 (-4.51, -0.54)</b> | <b>0.013</b> | <b>-3.22 (-5.71, -0.73)</b> | <b>0.011</b> | -1.57 (-4.67, 1.53)  | 0.320   |
| <b>Model 1</b>           |                             |              |                             |              |                      |         |
| Food secure              | 0.00                        | -            | 0.00                        | -            | 0.00                 | -       |
| Marginal FI <sup>1</sup> | 0.33 (-1.39, 2.06)          | 0.704        | 0.13 (-2.28, 2.54)          | 0.915        | 0.42 (-1.82, 2.65)   | 0.709   |
| Moderate FI <sup>1</sup> | <b>-1.82 (-3.27, -0.37)</b> | <b>0.014</b> | <b>-2.35 (-4.17, -0.54)</b> | <b>0.011</b> | -1.23 (-3.44, 0.99)  | 0.276   |
| Severe FI <sup>1</sup>   | <b>-2.09 (-4.04, -0.14)</b> | <b>0.036</b> | <b>-2.81 (-5.25, -0.37)</b> | <b>0.024</b> | -1.19 (-4.29, 1.90)  | 0.450   |
| <b>Model 2</b>           |                             |              |                             |              |                      |         |
| Food secure              | 0.00                        | -            | 0.00                        | -            | 0.00                 | -       |
| Marginal FI <sup>1</sup> | 0.76 (-0.97, 2.49)          | 0.387        | 0.43(-2.01, 2.87)           | 0.729        | 0.88 (-1.37, 3.13)   | 0.441   |
| Moderate FI <sup>1</sup> | -1.13 (-2.57, 0.31)         | 0.125        | <b>-1.91 (-3.74, -0.08)</b> | <b>0.041</b> | -0.20 (-2.42, 2.02)  | 0.861   |
| Severe FI <sup>1</sup>   | -1.23 (-3.19, 0.72)         | 0.216        | -2.24 (-4.65, 0.16)         | 0.067        | 0.01 (-3.13, 3.15)   | 0.955   |
| <b>Model 3</b>           |                             |              |                             |              |                      |         |
| Food secure              | 0.00                        | -            | 0.00                        | -            | 0.00                 | -       |
| Marginal FI <sup>1</sup> | 1.44 (-0.28, 3.17)          | 0.100        | 1.19 (-1.22, 3.59)          | 0.333        | 1.61 (-0.67, 3.90)   | 0.166   |
| Moderate FI <sup>1</sup> | -0.27 (-1.82, 1.29)         | 0.735        | -1.08 (-3.04, 0.88)         | 0.278        | 0.66 (-1.72, 3.05)   | 0.586   |
| Severe FI <sup>1</sup>   | -0.01 (-2.17, 2.16)         | 0.944        | -1.18 (-3.79, 1.43)         | 0.373        | 1.39 (-2.05, 4.83)   | 0.426   |
| <b>HE Self-efficacy</b>  |                             |              |                             |              |                      |         |
| <b>Univariate</b>        |                             |              |                             |              |                      |         |
| Food secure              | 0.00                        | -            | 0.00                        | -            | 0.00                 | -       |
| Marginal FI <sup>1</sup> | -1.72 (-3.72, 0.28)         | 0.091        | -1.52 (-4.14, 1.10)         | 0.255        | -2.53 (-5.32, 0.26)  | 0.075   |
| Moderate FI <sup>1</sup> | <b>-3.08 (-4.81, -1.35)</b> | <b>0.001</b> | <b>-3.46 (-5.65, -1.26)</b> | <b>0.002</b> | -2.76 (-5.55, 0.028) | 0.052   |
| Severe FI <sup>1</sup>   | -2.06 (-4.13, 0.02)         | 0.052        | <b>-3.13 (-5.72, -0.54)</b> | <b>0.018</b> | -1.08 (-4.22, 2.07)  | 0.502   |
| <b>Model 1</b>           |                             |              |                             |              |                      |         |
| Food secure              | 0.00                        | -            | 0.00                        | -            | 0.00                 | -       |
| Marginal FI <sup>1</sup> | -1.75 (-3.75, 0.26)         | 0.087        | -1.31 (-3.93, 1.32)         | 0.329        | -2.39 (-5.15, 0.38)  | 0.090   |
| Moderate FI <sup>1</sup> | <b>-2.88 (-4.59, -1.16)</b> | <b>0.001</b> | <b>-3.19 (-5.44, -0.94)</b> | <b>0.006</b> | -2.49 (-5.28, 0.29)  | 0.079   |
| Severe FI <sup>1</sup>   | -1.96 (-4.04, 0.13)         | 0.066        | <b>-2.85 (-5.42, -0.27)</b> | <b>0.030</b> | -0.84 (-3.99, 2.32)  | 0.602   |
| <b>Model 2</b>           |                             |              |                             |              |                      |         |
| Food secure              | 0.00                        | -            | 0.00                        | -            | 0.00                 | -       |
| Marginal FI <sup>1</sup> | -1.18 (-3.17, 0.82)         | 0.247        | -0.92 (-3.50, 1.65)         | 0.481        | -1.63 (-4.40, 1.14)  | 0.248   |
| Moderate FI <sup>1</sup> | <b>-1.94 (-3.68, -0.20)</b> | <b>0.029</b> | <b>-2.75 (-4.98, -0.52)</b> | <b>0.016</b> | -1.03 (-3.89, 1.82)  | 0.477   |
| Severe FI <sup>1</sup>   | -0.80 (-2.95, 1.33)         | 0.458        | -2.23 (-4.88, 0.42)         | 0.099        | 0.93 (-2.22, 4.07)   | 0.562   |
| <b>Model 3</b>           |                             |              |                             |              |                      |         |
| Food secure              | 0.00                        | -            | 0.00                        | -            | 0.00                 | -       |
| Marginal FI <sup>1</sup> | -0.72 (-2.72, 1.27)         | 0.477        | -0.46 (-3.04, 2.13)         | 0.729        | -1.11 (-3.95, 1.73)  | 0.442   |
| Moderate FI <sup>1</sup> | -1.40 (-3.18, 0.38)         | 0.122        | <b>-2.37 (-4.66, -0.09)</b> | <b>0.042</b> | -0.38 (-3.36, 2.60)  | 0.802   |

---

|                        |                     |       |                     |       |                    |       |
|------------------------|---------------------|-------|---------------------|-------|--------------------|-------|
| Severe FI <sup>1</sup> | -0.14 (-3.18, 0.38) | 0.906 | -1.87 (-4.82, 1.08) | 0.213 | 1.85 (-1.44, 5.14) | 0.270 |
|------------------------|---------------------|-------|---------------------|-------|--------------------|-------|

---

B: regression coefficient; 95% CI; 95% confidence interval; Model 1 is adjusted for region of residence, body weight status, and gender (in non-gender-stratified models). Model 2 is further adjusted for parental education and Model 3 is further adjusted for household income. Estimates are weighted to represent grade five students in Nova Scotia. Results in bold are statistically significant ( $p < 0.05$ ); <sup>1</sup>Food insecurity. PA: Physical activity; HE: Healthy eating
